# Supplementary material for: A sensitive BODIPY-based fluorescent probe for detecting endogenous hydroxyl radicals in living cells
Source: Royal Society of Chemistry journal article supplement (doi:10.1039/d0ra05378c), 2020-01-01
Supplement: d0ra05378c1.pdf [file d0ra05378c1.pdf]

## Supporting Information

### A Sensitive BODIPY-based Fluorescent Probe for Detecting Endogenous Hydroxyl Radicals in living Cells.

*Xingyu Qu, Yongjun Bian, \* Yongqiang Chen\*, Xiaoqing Wei*

*Department of Chemistry and Chemical Engineering, Jinzhong University, Jinzhong, Shanxi, 030600, China*

*Corresponding authors E-mail addresses: yjbian2013@jzxy.edu.cn; chen Yongqiang@jzxy.edu.cn.*

#### Table of Contents

|             |                                                                                                                       |
|-------------|-----------------------------------------------------------------------------------------------------------------------|
| Figure S1.  | <sup>1</sup> H NMR spectrum of compound <b>2</b> in CDCl <sub>3</sub> .                                               |
| Figure S2.  | <sup>13</sup> C NMR spectrum of compound <b>2</b> in CDCl <sub>3</sub> .                                              |
| Figure S3.  | HRMS spectrum of compound <b>2</b>                                                                                    |
| Figure S4.  | <sup>1</sup> H NMR spectrum of probe <b>1</b> .                                                                       |
| Figure S5.  | <sup>1</sup> H NMR spectrum of <b>OX-1</b> .                                                                          |
| Figure S6.  | <sup>13</sup> C NMR spectrum of probe <b>1</b> .                                                                      |
| Figure S7.  | <sup>13</sup> C NMR spectrum of probe <b>OX-1</b> .                                                                   |
| Figure S8.  | HRMS spectrum of probe <b>OX-1</b>                                                                                    |
| Figure S9.  | <sup>1</sup> H- <sup>1</sup> H COSY spectrum of probe <b>1</b> .                                                      |
| Figure S10. | <sup>1</sup> H- <sup>1</sup> H COSY spectrum of compound <b>OX-1</b> .                                                |
| Figure S11. | <sup>31</sup> P NMR spectrum of probe <b>1</b> .                                                                      |
| Figure S12. | <sup>31</sup> P NMR spectrum of <b>OX-1</b> .                                                                         |
| Figure S13. | MALDI-TOF MS of probe <b>1</b>                                                                                        |
| Figure S14. | MALDI-TOF MS of <b>OX-1</b> .                                                                                         |
| Figure S15. | The linear relationship between the fluorescence response and concentration of ·OH.                                   |
| Figure S16. | Comparison of <sup>31</sup> P NMR spectra of 2-diphenylphosphinobenzaldehyde, probe <b>1</b> and compound <b>OX-1</b> |
| Figure S17. | MTT assay of probe <b>1</b> .                                                                                         |
| Table S1.   | Optical properties of probe <b>1</b> and <b>OX-1</b> in various solvents at 298 K.                                    |

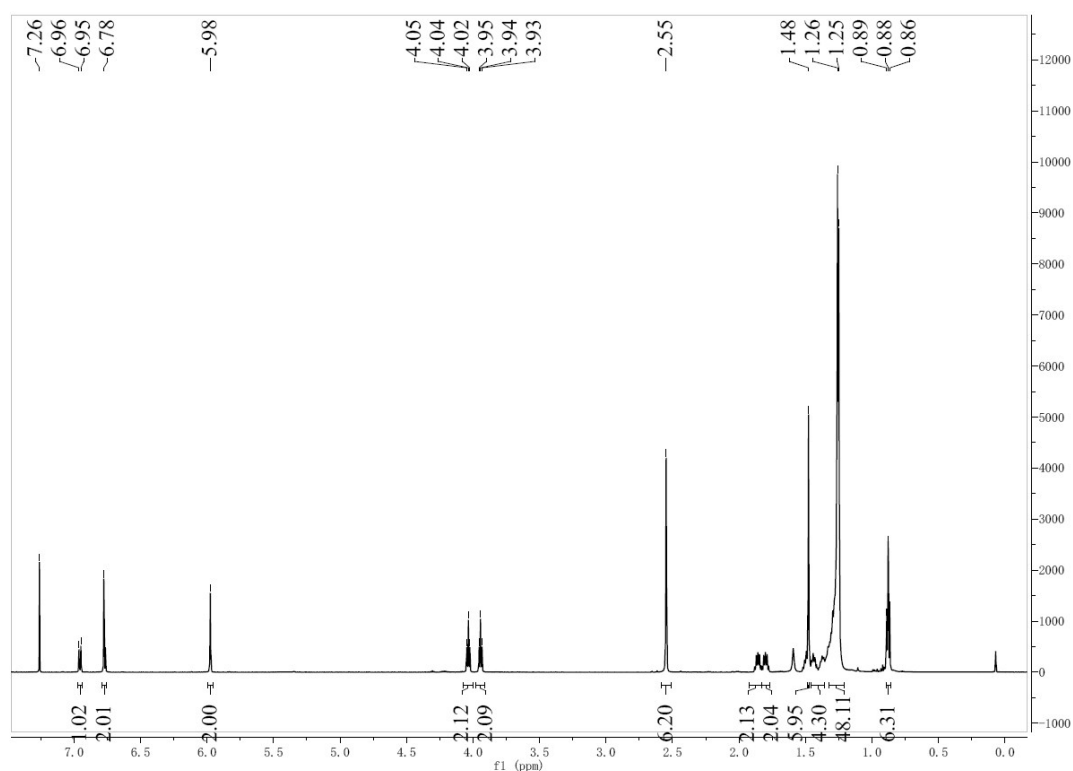

**Figure S1:** <sup>1</sup>H NMR spectrum of compound **2** in CDCl<sub>3</sub>.

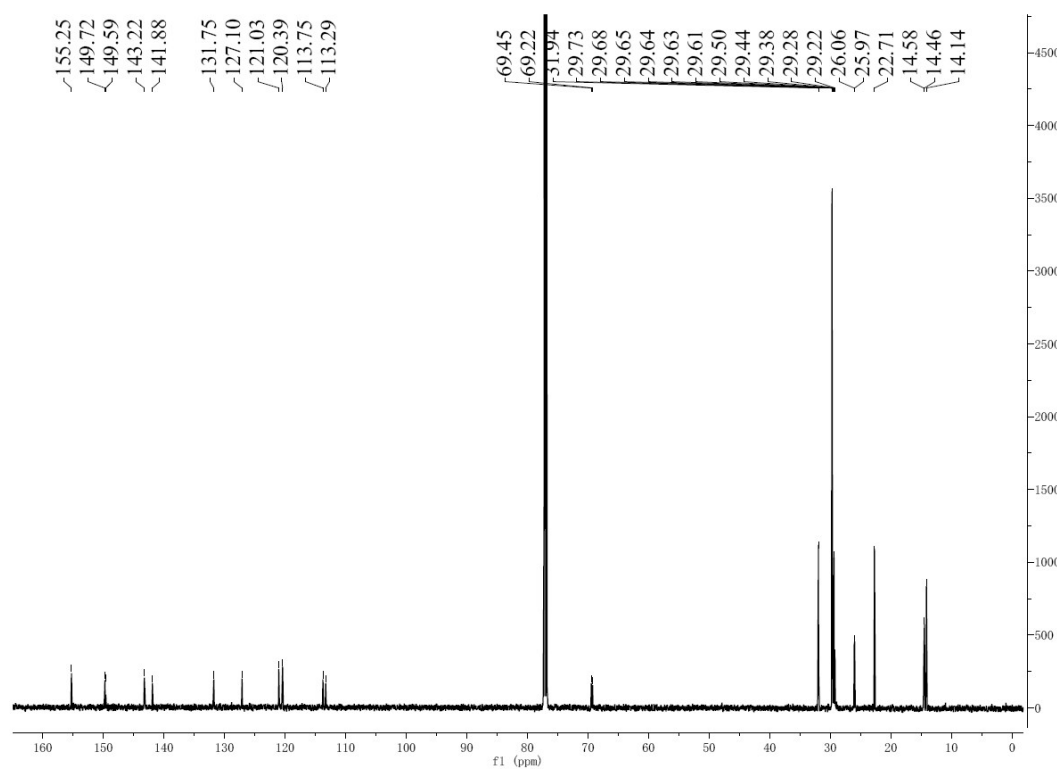

**Figure S2:** <sup>13</sup>C NMR spectrum of compound **2** in CDCl<sub>3</sub>.

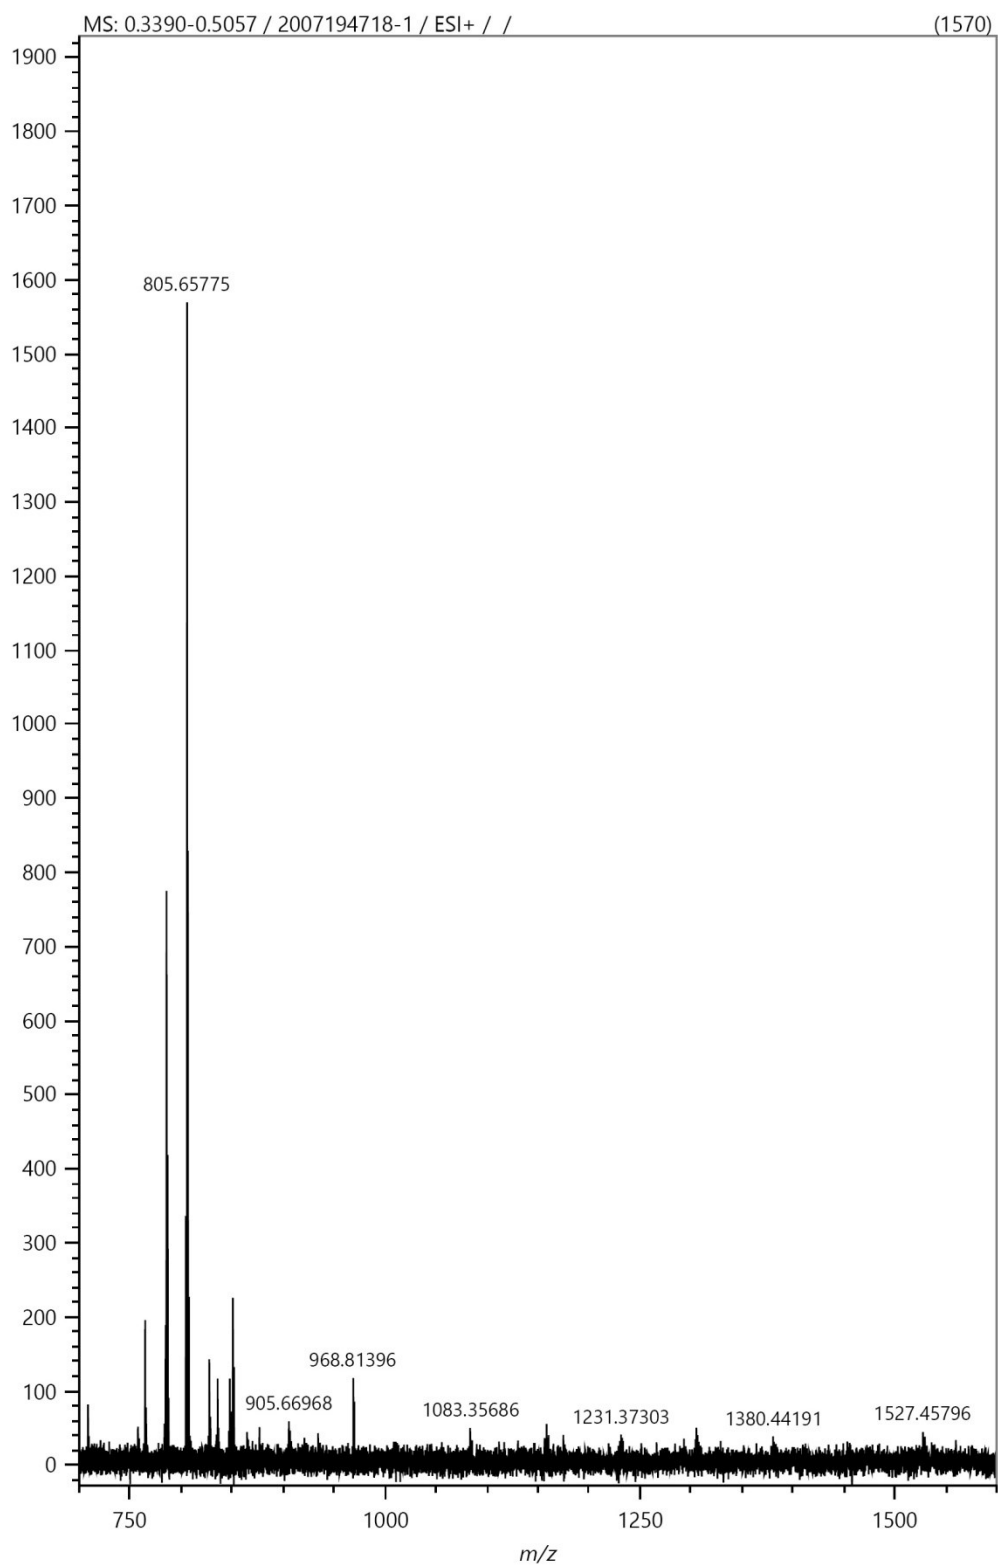

**Figure S3.** HRMS spectrum of compound 2

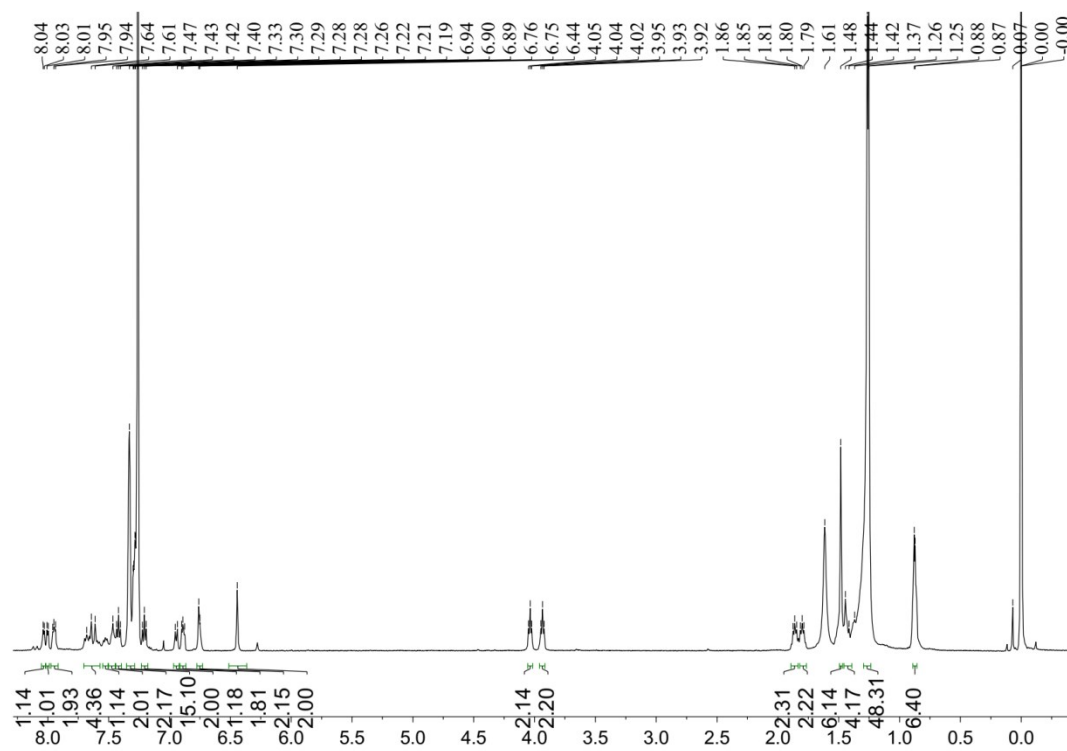

**Figure S4:** <sup>1</sup>H NMR spectrum of probe **1** in CDCl<sub>3</sub>.

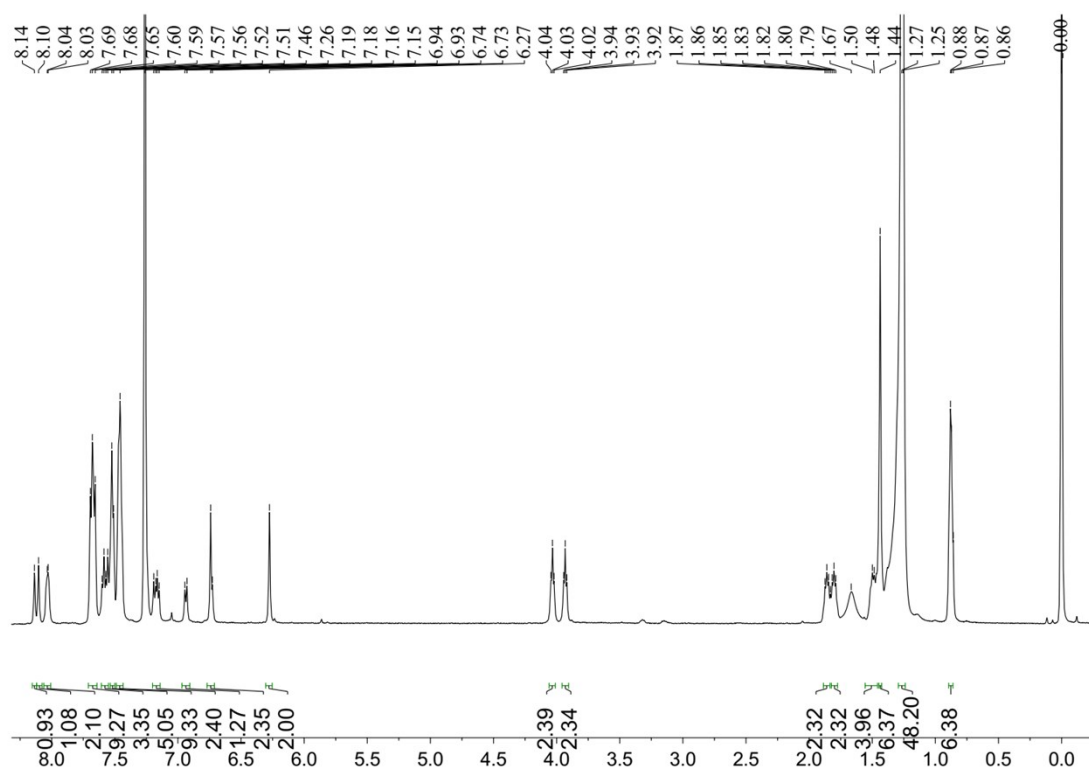

**Figure S5:** <sup>1</sup>H NMR spectrum of probe **OX-1** in CDCl<sub>3</sub>.

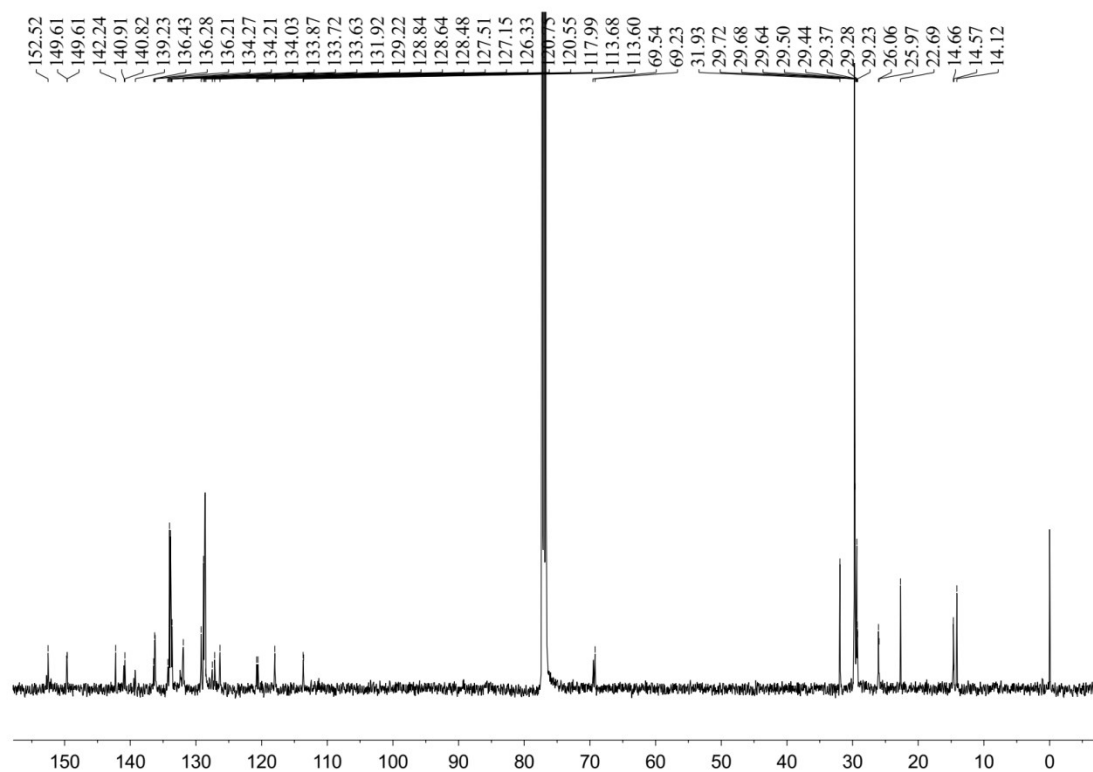

**Figure S6:** <sup>13</sup>C NMR spectrum of probe 1 in CDCl<sub>3</sub>.

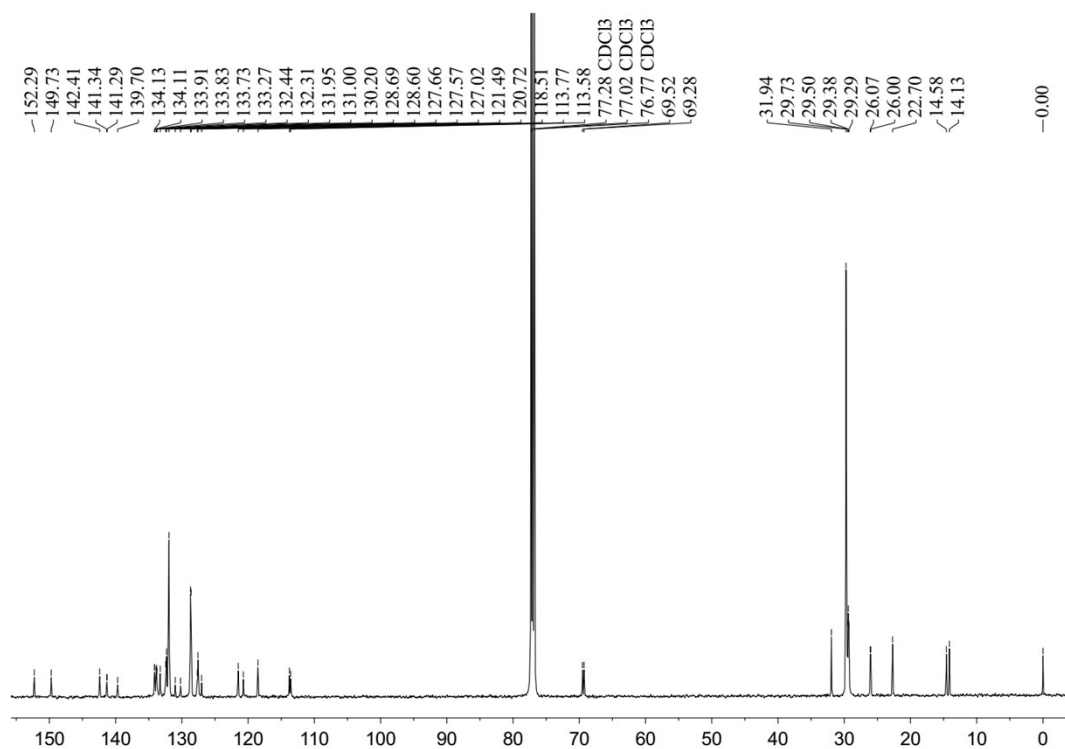

**Figure S7:** <sup>13</sup>C NMR spectrum of probe OX-1 in CDCl<sub>3</sub>.

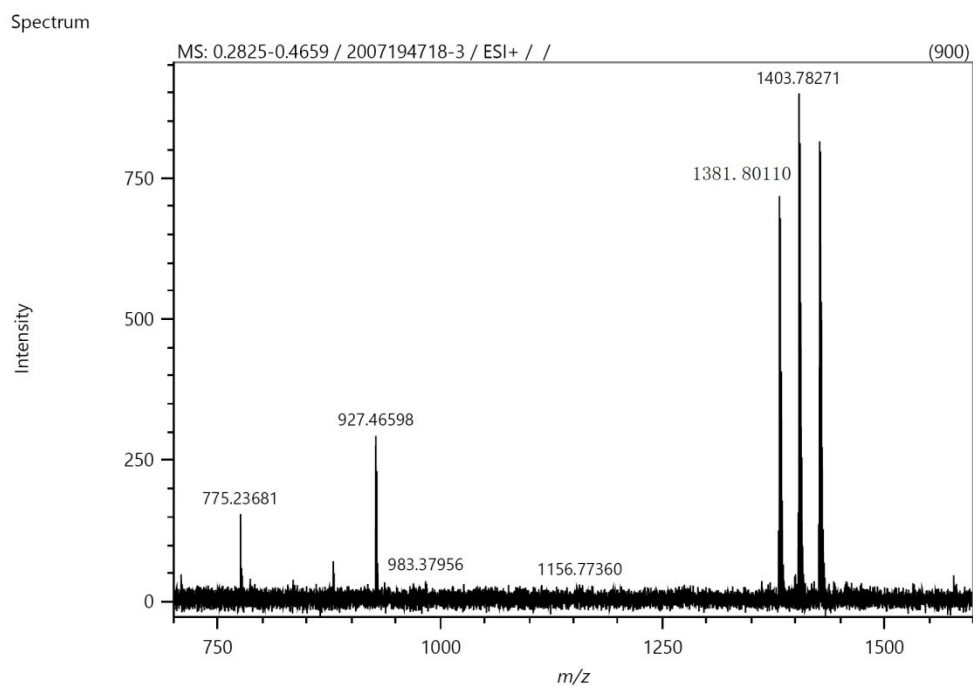

**Figure S8.** HRMS spectrum of probe **OX-1**

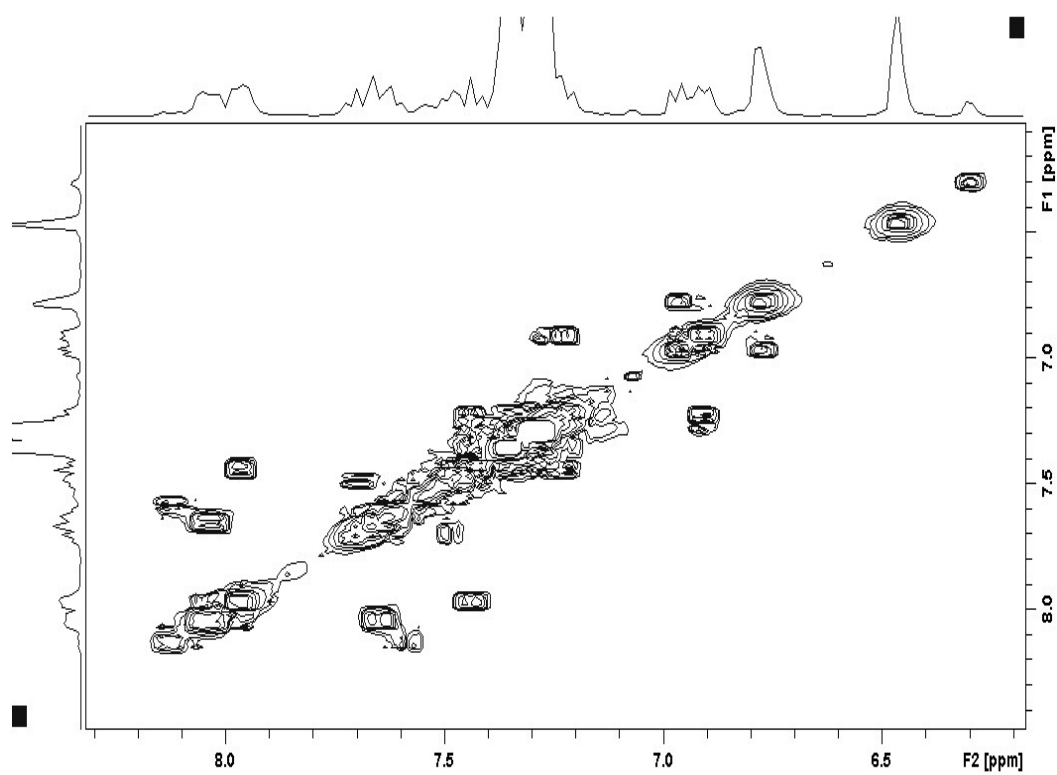

**Figure S9:**  $^1\text{H}$ - $^1\text{H}$  COSY spectrum of probe **1** in  $\text{CDCl}_3$ .

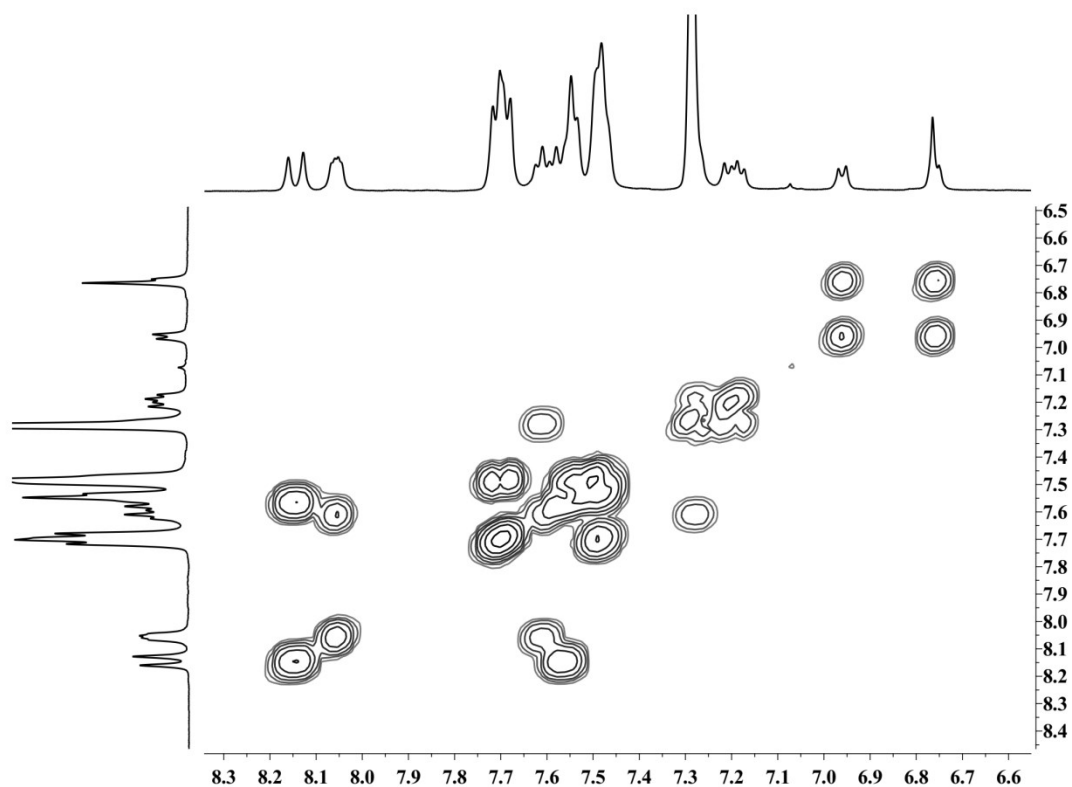

**Figure S10:**  $^1\text{H}$ - $^1\text{H}$  COSY spectrum of compound **OX-1** in  $\text{CDCl}_3$ .

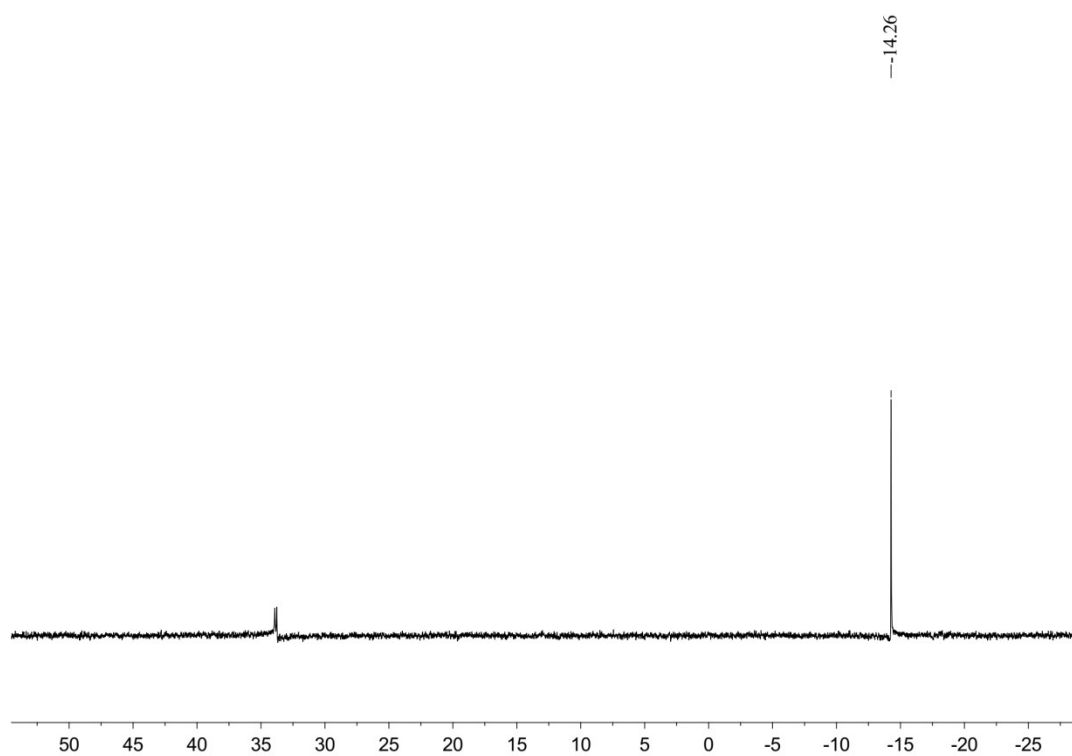

**Figure S11:**  $^{31}\text{P}$  NMR spectrum of probe **1** in  $\text{CDCl}_3$ .

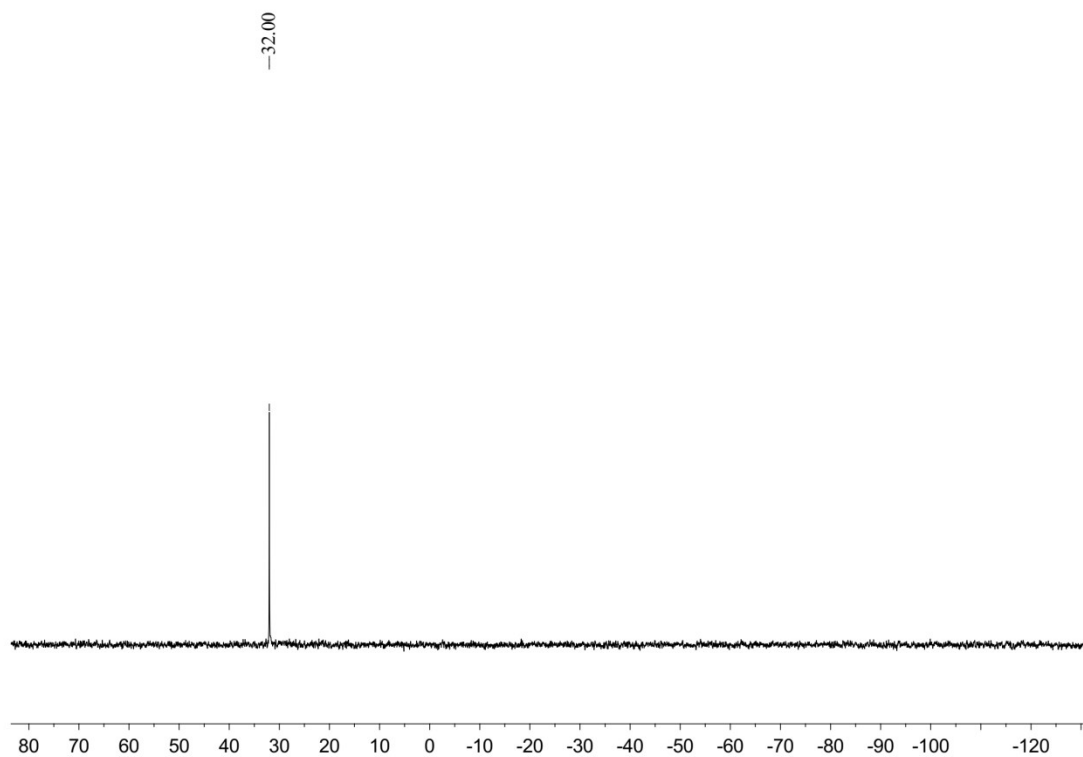

**Figure S12:**  $^{31}\text{P}$  NMR spectrum of probe **OX-1** in  $\text{CDCl}_3$ .

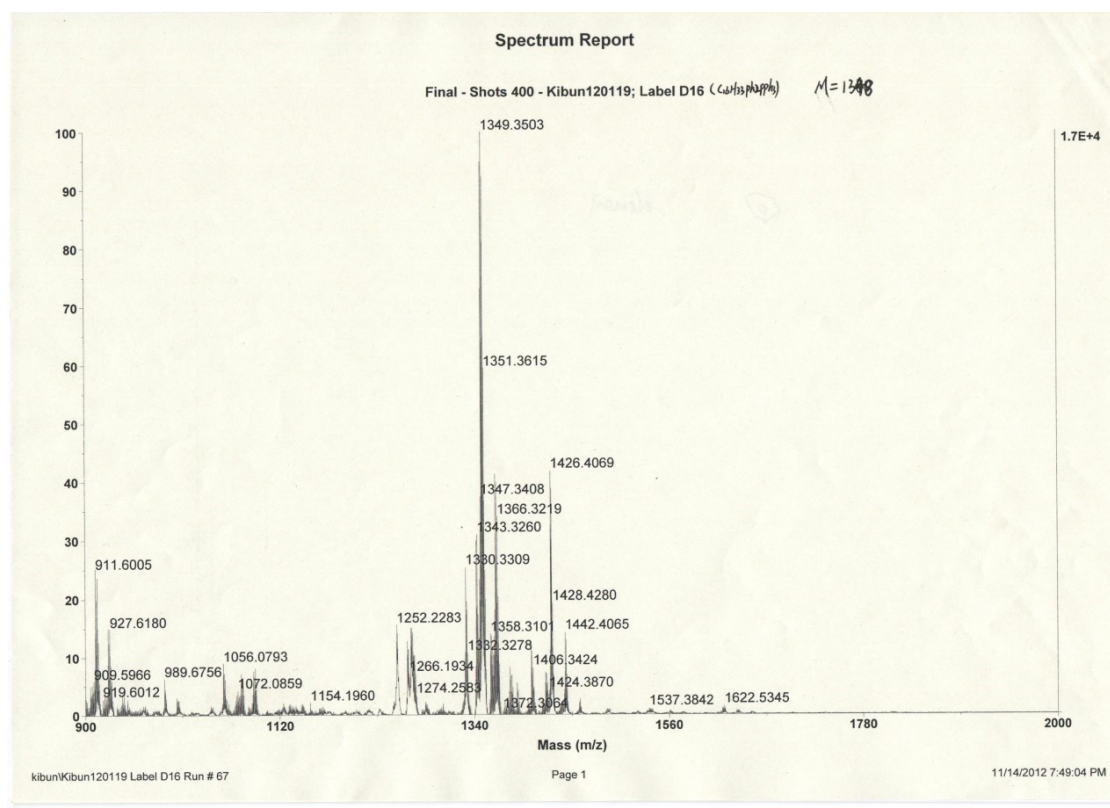

**Figure S13:** MALDI-TOF MS of probe **1**.



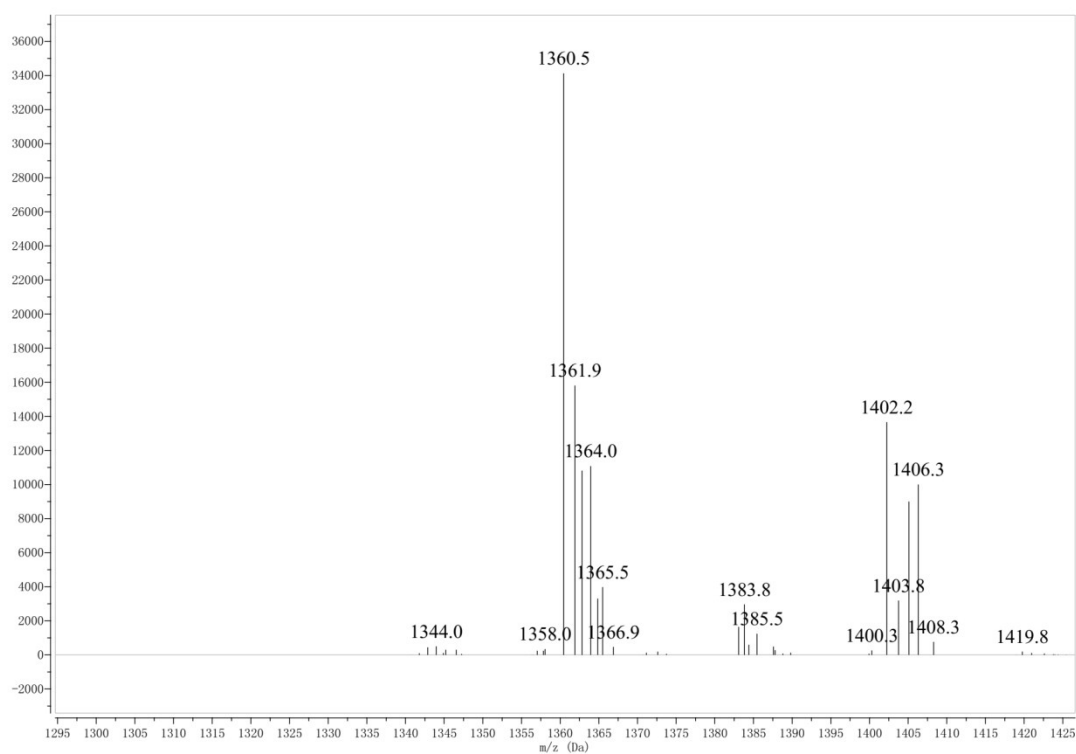

**Figure S14:** MALDI-TOF MS of OX-1.

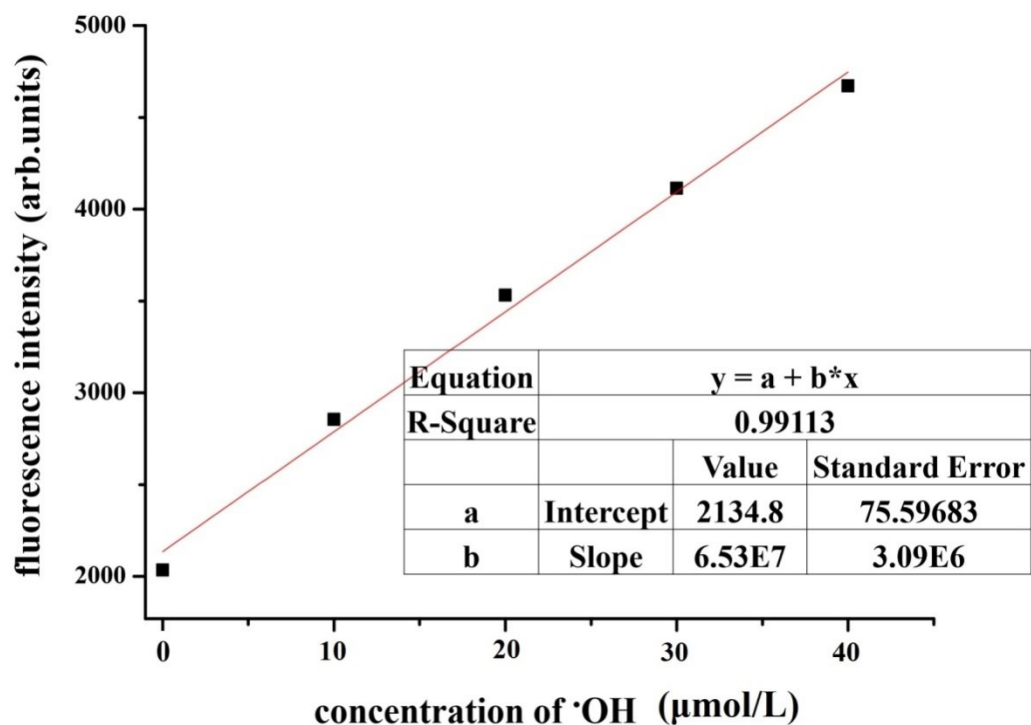

**Figure S15:** The linear relationship between the fluorescence response and concentration of  $\cdot\text{OH}$  ( $\lambda_{\text{ex}} = 580 \text{ nm}$ ,  $\lambda_{\text{em}} = 650 \text{ nm}$ ).

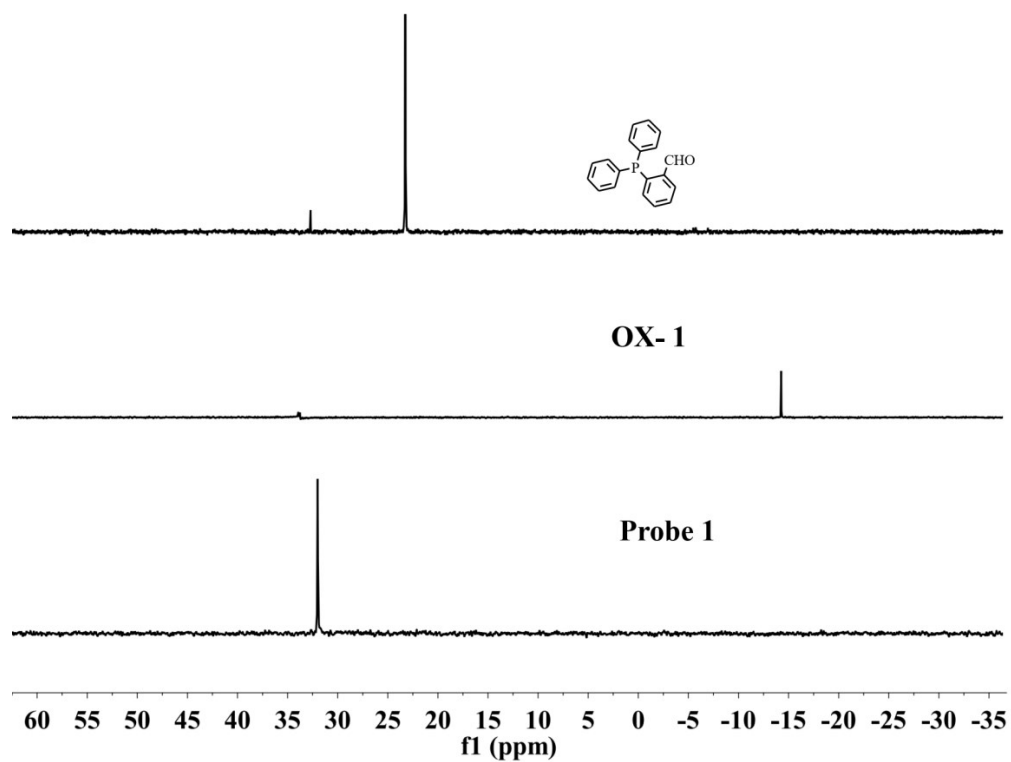

**Figure S16:** Comparison of  $^{31}\text{P}$  NMR spectra of 2-diphenylphosphinobenzaldehyde, probe **1** and compound **OX-1** in  $\text{CDCl}_3$

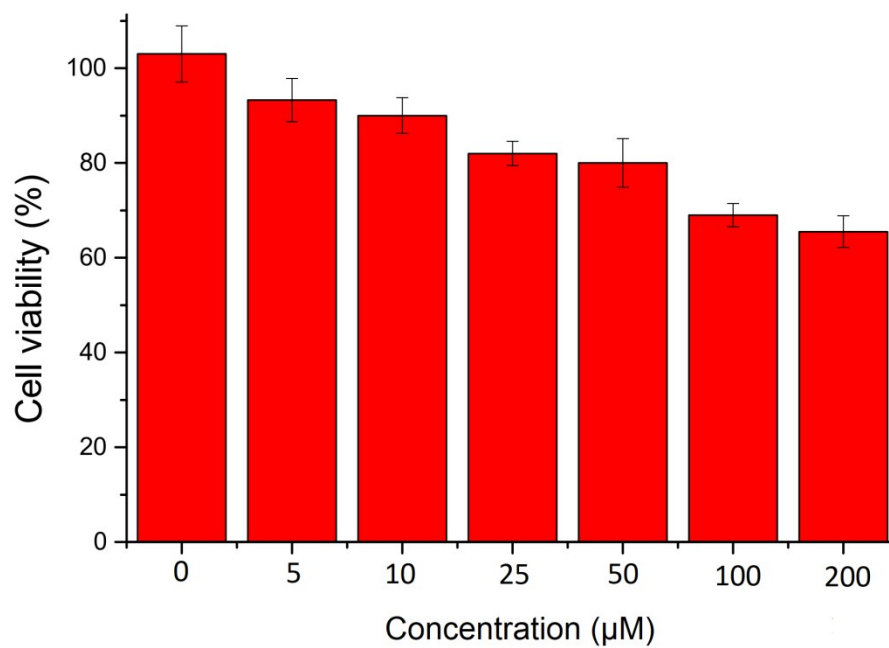

**Figure S17:** MTT assay of probe **1**.

**Table S1:** Optical properties of probe **1** and **OX-1** in various solvents at 298 K.

| compound    | solvent                         | $\lambda_{\text{abs}}^{\text{max}}(\text{nm})$ | $\lambda_{\text{em}}$ | $\Phi_{\text{f}}$ |
|-------------|---------------------------------|------------------------------------------------|-----------------------|-------------------|
| <b>1</b>    | Hexane                          | 627, 577, 342                                  | 642                   | 0.78              |
|             | CH <sub>2</sub> Cl <sub>2</sub> | 633, 574, 349                                  | 650                   | 0.68              |
|             | CH <sub>3</sub> OH              | 627, 576, 344                                  | 640                   | 0.69              |
|             | CH <sub>3</sub> CN              | 624, 574, 345                                  | 640                   | 0.40              |
|             | DMSO                            | 628, 581                                       | 650                   | 0.26              |
| <b>OX-1</b> | Hexane                          | 625, 574, 349                                  | 641                   | 0.71              |
|             | CH <sub>2</sub> Cl <sub>2</sub> | 630, 574, 355                                  | 646                   | 0.63              |
|             | CH <sub>3</sub> OH              | 624, 570, 350                                  | 639                   | 0.81              |
|             | CH <sub>3</sub> CN              | 620, 571, 349                                  | 635                   | 0.80              |
|             | DMSO                            | 630, 577                                       | 647                   | 0.62              |
